# Supplementary material for: Plasmonic nanopapers: flexible, stable and sensitive multiplex PUF tags for unclonable anti-counterfeiting applications
Source: Royal Society of Chemistry journal article supplement (doi:10.1039/d0nr01223h), 2020-01-01
Supplement: d0nr01223h1.pdf [file d0nr01223h1.pdf]

## Supplementary information

### **Plasmonic nanopapers: flexible, stable and sensitive multiplex PUF tags for unclonable anti-counterfeiting applications**

Hongrui Cheng,<sup>a</sup> Yongfeng Lu,<sup>a</sup> Dongyan Zhu,<sup>a</sup> Lorenzo Rosa<sup>b,c</sup>, Fei Han,<sup>a</sup>

Mingguo Ma<sup>d</sup>, Wenyue Su<sup>a</sup>, Paul S. Francis<sup>e</sup> and Yuanhui Zheng<sup>\*a</sup>

<sup>a</sup>College of Chemistry, Fuzhou University, Fuzhou, Fujian, 350116, China

<sup>b</sup>Department of Engineering “Enzo Ferreri”, University of Modena and Reggio Emilia, via Vivarelli 10, I-41125, Modena, Italy

<sup>c</sup>Applied Plasmonics Lab, Centre for Micro-Photonics, Mail H74, P.O. Box 218, Hawthorn, VIC 3122, Australia

<sup>d</sup>College of Materials Science and Technology, Beijing Forestry University, Beijing 100083, China

<sup>e</sup>School of Life and Environmental Sciences, Faculty of Science, Engineering and Built Environment, Deakin University, Waurn Ponds, Victoria 3216, Australia

\* Yuanhui.Zheng@fzu.edu.cn

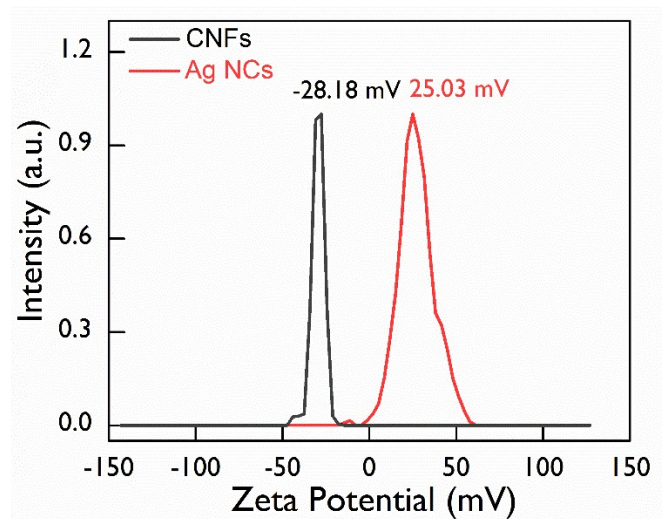

**Fig. S1.** Zeta potential of the building blocks: AgNCs (red curve) and CNFs (black curve).

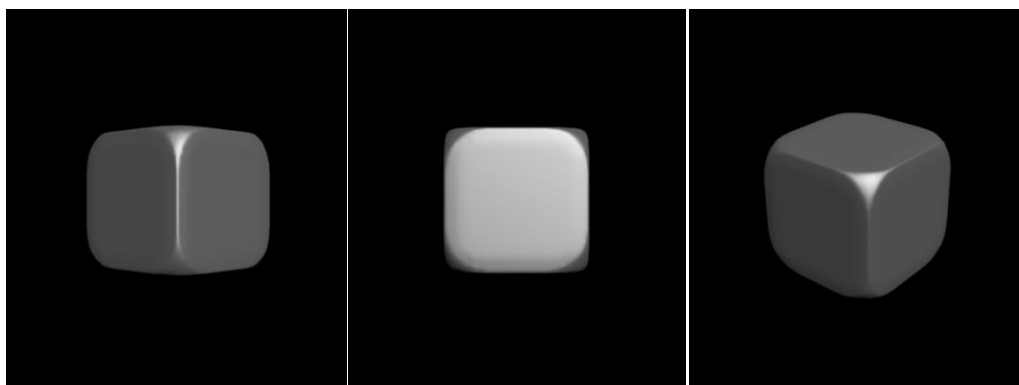

**Fig. S2.** Three the most common shapes of cubes with different orientations.

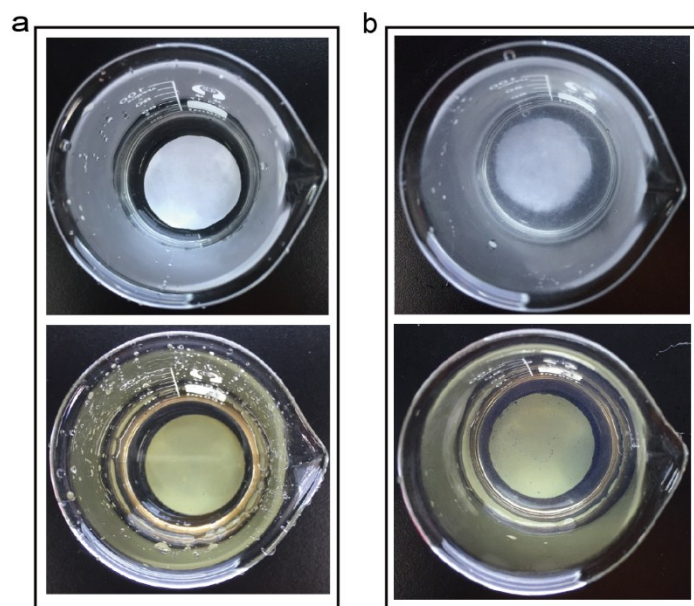

**Fig. S3.** The plasmonic nanopaper and A4 paper with the ultrasonic-resistant experiment: (a) before and (b) after ultrasonication for 30 min with power of 400 W.

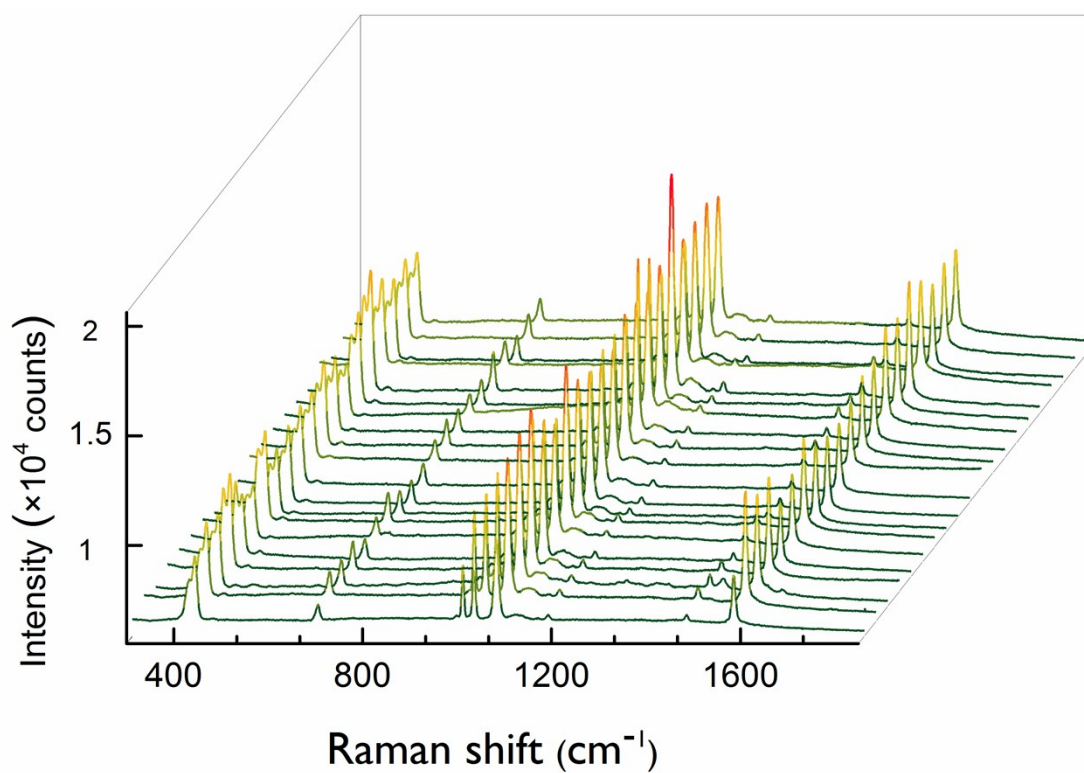

**Fig. S4.** Spot-to-spot SERS spectra of 1  $\mu\text{M}$  benzenethiol adsorbed on the plasmonic nanopaper.

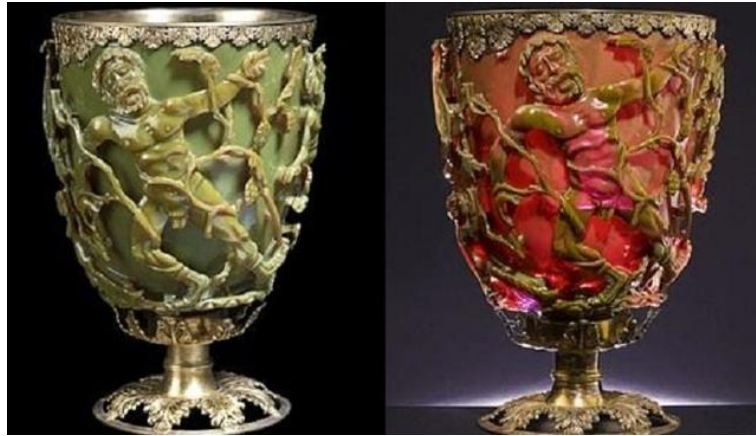

**Fig. S5.** Photographs of the Lycurus Cup in reflected light (left) and transmitted light (right) (from.britishmuseum).
